# Supplementary material for: Classification and clinical behavior of blastic plasmacytoid dendritic cell neoplasms according to their maturation-associated immunophenotypic profile
Source: PubMed Central journal article supplement (PMC4662485; doi:10.18632/oncotarget.4146), 2015-05-25
Supplement: oncotarget-06-19204-s001.pdf [file oncotarget-06-19204-s001.pdf]

## SUPPLEMENTARY TABLES

**Supplementary Table S1. Monoclonal antibody reagents used for the immunophenotypic characterization of blastic plasmacytoid dendritic cell neoplasms****Supplementary Table S2. Immunophenotypic characteristics of blastic plasmacytoid dendritic cell neoplasms according to the three phenotypic-based groups defined in this study****Supplementary Table S3. Clinical features and outcome of aggressively-treated blastic plasmacytoid dendritic cell neoplasms ( $n = 25$ ) according to the type of polychemotherapy regimen received**

| Patients features              | ALL-type<br>$n = 7$ | AML-type<br>$n = 9$ | C(H)OP-type<br>$n = 9$ | <i>P</i> -value      |
|--------------------------------|---------------------|---------------------|------------------------|----------------------|
| Age (years)                    | 36 ± 27 (8–70)      | 47 ± 17 (10–65)     | 67 ± 15 (42–81)        | ≤.03 <sup>a, b</sup> |
| Age distribution (child/adult) | 3/4 (43%/57%)       | 1/8 (11%/89%)       | 0/9 (0%/100%)          | NS                   |
| Sex (male/female)              | 6/1 (86%/14%)       | 3/6 (33%/67%)       | 8/1 (89%/11%)          | .03 <sup>b</sup>     |
| <b>Clinical outcome</b>        |                     |                     |                        |                      |
| Median EFS (months)            | NR                  | 8 (7–9)             | 7 (4–10)               | .01 <sup>a</sup>     |
| Median OS (months)             | NR                  | 11 (8–14)           | 10 (4–16)              | .03 <sup>a</sup>     |
| Complete remission             | 7/7 (100%)          | 9/9 (100%)          | 7/9 (78%)              | NS                   |
| Relapse                        | 3/7 (43%)           | 7/9 (78%)           | 7/7 (100%)             | .04 <sup>a</sup>     |
| CNS relapse/progression        | 1/6 (17%)           | 1/4 (25%)           | 5/6 (83%)              | .04 <sup>a</sup>     |
| AHSC transplantation           | 2/7 (29%)           | 3/9 (33%)           | 0/9 (0%)               | NS                   |
| Overall mortality              | 3/7 (43%)           | 8/9 (89%)           | 9/9 (100%)             | .02 <sup>a</sup>     |
| Deaths after remission         | 3/7 (43%)           | 8/9 (89%)           | 7/7 (100%)             | .04 <sup>a</sup>     |
| Deaths after transplant        | 0/2 (0%)            | 2/3 (67%)           | NA                     | NS                   |

Results expressed as number of cases from all cases with available data (percentage) except for age, where mean ± one standard deviation is used, and EFS and OS where results are expressed as median and lower and upper limits of 95% confidence interval. <sup>a</sup>ALL-type therapy vs C(H)OP-type therapy <sup>b</sup>AML-type therapy vs C(H)OP-type therapy. BPDC: blastic plasmacytoid dendritic cell; ALL: acute lymphoblastic leukemia; AML: acute myeloblastic leukemia; C(H)OP-like therapy: COP/CHOP-like therapy; NS: no statistically significant differences ( $p > 0.05$ ); EFS: event free survival; NR: not reached; OS: overall survival; CNS: central nervous system; AHSC: allogeneic hematopoietic stem cell; NA: not applicable.
